# Supplementary material for: Mobility Functional Status Ascertainment in Electronic Health Records using Large Language Models
Source: Research Square preprint supplement (doi:10.21203/rs.3.rs-7104310/v1), 2025-07-29
Supplement: Supplementary file 1 [file 079f11ef26b9815fe677d14d.docx]

**Mobility Functional Status Ascertainment in Electronic Health Records using Large Language Models**

# Xingyi Liu, PhD1,*, Muskan Garg, PhD1, Heling Jia, MD, MS1, Jennifer St. Sauver, PhD2, Sandeep R. Pagali, MD, MPH3, and Sunghwan Sohn, PhD1

1Mayo Clinic, Department of AI and Informatics, Rochester, 55905, USA

2Mayo Clinic, Department of Quantitative Health Sciences, Rochester, 55905, USA

3Mayo Clinic, Department of Medicine, Rochester, 55905, USA

*liu.xingyi@mayo.edu

**Supplementary Material**

**A Supplementary Section: Annotation Guidelines for Mobility Functional status Project**

1. **Background:**

As the global population ages, it is essential that health care shifts its emphasis to the rapidly growing older population with disabilities. Traditional medical diagnoses, particularly assessed through ICD 9/10 codes, are insufficient in predicting service requirements, hospital stays, and optimal care for these individuals. Recently, global concerns about health care outcomes have shifted from mere mortality data to assessing functional status in daily life, which is crucial for precision medicine. The primary objectives of healthcare for older individuals include preserving independence, preventing functional deterioration, and enhancing their quality of life. And Functional profiles of patients, in addition to diagnostic data, offer a comprehensive understanding of their health, aiding in tailored treatment plans and better clinical outcomes. Unfortunately, standardized collection of functional status data for geriatric patients is lacking. However, electronic health records (EHRs) often contain relevant information regarding patient functional status. Extracting and normalizing this Functional Status Information (FSI) from EHRs is an underexplored area but holds immense potential for advancing precision medicine and enhancing clinical practice.

1. **Annotation Tool:**

Using MedTator, that is a serverless text annotation tool for corpus development, to access an efficient annotation solution linking different entities. To protect patients’ data privacy, using the offline version of MedTator to perform the annotation, which can download from (<https://github.com/OHNLP/MedTator>).

1. **Instructions:**

Kindly utilize this document for annotation to ensure alignment in our understanding. The guideline section will contain the majority of the annotation information. We will follow batch-based process to conduct annotation. The process includes annotation data training, development of annotation guideline, double annotation phase and single annotation adjudication phase.

3.1 Data Training:

Annotators will review 200 clinic notes as training data, their responsibilities are to identify and highlight the entire sentence or phrases that include the keywords relevant to Mobilities and assign corresponding attributes according to the background and purpose of the project to develop the initial guideline. Revise questions raised during the data training process and then compare annotations with the gold standard to refine the initial guideline.

3.2 Annotation Flow:

- Guideline Development Phase: Each annotator is tasked with annotating a set of clinical notes. Subsequently, compute the inter-annotator agreement (IAA) and refine the guidelines. This iterative process will persist until a substantial level of agreement is achieved.
- Annotation Phase: A total of 600 clinical notes will undergo annotation. Following the completion of annotations, calculate the inter-annotator agreement (IAA), address any discrepancies, and enhance the guidelines. Each clinical document will be annotated independently by two annotators.

During the review of each clinical note, annotators require to concentrate on all keywords relevant to Mobilities and their various forms, and descriptions of pertinent diagnosis, symptom, system review, chief complaint, medical history, lab results, surgery or procedurals plan of treatment and so on, that may interfere with mobilities. Annotators need to highlight the entire sentence or phrase and assign the appropriate attributes to each expression.

- Adjudication Phase: To create the ultimate gold standard annotations, the adjudicator will discuss with annotators and combine the annotations provided by individual experts and address any mismatches through adjudication. Additionally, the annotation guideline will incorporate insights gained and case examples from the clinical notes utilized for training.

1. **Guideline:**

4.1 Objective:

- Assess “mobility” FSI documentation associated with geriatric syndrome “falls” in EHRs.
- Captures the electronic data related to patients’ chief complaints, the electronic index of coded diagnoses, symptoms, surgery or procedures, treatment plan, and laboratory results from EHRs.
- The reference standard of mobility FSI will be assembled from WHODAS 2.011 mobility questions. It covers five domains of functioning, including mobility, and is directly linked at the level of concepts to the International Classification of Functioning, Disability and Health (ICF).
- Leverage the ICF to map FSI to the standard form.

4.2 Data Schema:

There are 5 mobility functional status classes:

1. Body position change: this class includes categories Basic position changing, Basic position Maintaining, Transferring oneself and Other.
2. Object Handle: this class includes categories Lifting and carrying, Moving object with lower extremities, Fine hand use, Hand and arm use, Fine foot use, and Other.
3. Walking and Moving: this class include Walking, Going up and down stairs, Moving around, Moving around in different locations, Moving around using Equipment and Other.
4. Transportation use: this class include Using Transportation, Driving, Riding animal and Other.
5. Other Mobility: this class include Other specified mobility and Unspecified mobility.

Also, Annotator need to assign attributes to each highlighted expression:

Status (impaired/unimpaired), Negation(yes/no), Experiencer (patient/other), Severity (severe/moderate/mild/uncertain/NA), Historical term (current/past/future), Exclusion (yes/no), and Comment.

4.3 Annotation Categories:

- **Changing and maintaining body position (d410-d429):**
- **ICF Activity:** Changing basic body position

**ICF Code:** d410

**ICF Definition:** Getting into and out of a body position and moving from one location to another, such as getting up out of a chair to lie down on a bed, and getting into and out of positions of sitting, standing, kneeling or squatting.

**Inclusion:**

- Lying down (d4100): **Getting into and out of a lying down position or changing body position**, from horizontal to any other position, such as standing up or sitting down; getting into a prostrate position.
- Squatting (d4101): **Getting into and out of the seated or crouched posture on one's haunches with knees closely drawn up or sitting on one's heels**, such as may be necessary in toilets that are at floor level or changing body position from squatting to any other position, such as standing up.
- Kneeling (4102): **Getting into and out of a position where the body is supported by the knees with legs bent**, such as during prayers, or changing body position from kneeling to any other position, such as standing up.
- Sitting (4103): **Getting into and out of a seated position and changing body position from sitting down to any other position**, such as standing up or lying down; getting into a sitting position with bent legs or cross-legged; getting into a sitting position with feet supported or unsupported.
- Standing (d4104): **Getting into and out of a standing position or changing body position** from standing to any other position, such as lying down or sitting down.
- Bending (d4105): **Tilting the back downwards or to the side**, at the torso, such as in bowing or reaching down for an object.
- Shifting the body’s center of gravity (d4106): **Adjusting or moving the weight of the body from one position to another** while sitting, standing or lying, such as moving from one foot to another while standing. Exclude Transferring oneself (d420) and Walking (d450)
- Rolling over (d4107): **Moving the body from one position to another** while lying such as turning from side to side or from stomach to back.
- Other specified changing basic body position (d4108)
- Changing basic body position, unspecified (d4109)

**Exclusions:**

- Transferring oneself (d420): moving from one surface to another without changing the body position, such as moving from wheelchair to toilet.

**Examples:**

Inclusion:

“He *went back to bed*, and he *got back up* again.”

“He *got up to go* the bathroom.”

Regarding examples above, highlight the entire sentences that include the keywords “go bake to bed,” “get back up,” “get up,” that means the patient can change their body positions, so the annotator adds the “BodyPosionChange” label to it and assign category as “PositionChanging”, Status as “unimpaired”, Severity as “N/A”, Experience as “patient”, Severity as “N/A”, HistoricalTerm as “current”, and Exclusion as “no.”

“*Sit to stand: independent with use of UE support, slow and effortful.”* highlight the entire sentences that include the keywords “sit to stand,” the annotator adds the “BodyPosionChange” label to it and assign the subcategory as “PositionChanging”. Although the patient can do sit to stand independent, but he/she needs upper extremity to support, so set Status as “impaired”, Severity as “N/A”, Experience as “patient”, Severity as “N/A”, HistoricalTerm as “current”, and Exclusion as “no.”

“Patient feels *uncomfortable also when the knee bends*.” Highlight the entire sentences that include the keywords “the knee bends” the annotator adds the “BodyPosionChange” label to it and assign the subcategory as “PositionChanging”, Status as “impaired”, Severity as “N/A”, Experience as “patient”, Severity as “N/A”, HistoricalTerm as “current”, and Exclusion as “no.”

“She was *walking out to a cab*, after watching her son play in a band, when the carpet rolled up under her foot.” This example indicates the patient moved out from the vehicle from sitting to standing, so highlight the entire sentence and add the label “BodyPositionChange”, assign the attributes Category as “PositionChanging”. And also set Status as “unimpaired”, Severity as “N/A”, Experience as “patient”, Severity as “N/A”, HistoricalTerm as “current”, and Exclusion as “no.”

“Transfer - Stand to Sit

# of Assistants: 1

Level of Assistance: Independent

Transfers

Transfer: Yes”

Highlight this entire expression and assign it to “BodyPositionChange” class. Although there are keywords Transfer here, we still set the text to the “PositionChanging” subcategory instead of “Transfer Oneself” subcategory because “Transfer Oneself” in ICF definition means “Moving from one surface to another, such as sliding along a bench or moving from a bed to a chair, without changing body position.” And also set Status as “unimpaired”, Severity as “N/A”, Experience as “patient”, Severity as “N/A”, HistoricalTerm as “current”, and Exclusion as “no.”

Exclusion:

“*Bending* increases pressure in the eye.” Although keyword “bend” is included in the sentence, it doesn’t mean the body mobility, so exclude it.

“Instructed *transfer sit to/from stand and sit to/from supine* with good understanding demonstrated.” Although this sentence contains the keywords “sit to/from stand” and “sit to/from supine”, that descripts the body position changing, it come from an **instruction**, so assign it to “BodyPositionChange” class and “PositionChanging” subcategory and set Exclusion as “Yes.”

“*Squat* with Chair Touch”, highlight this expression and assign it to “BodyPositionChange” class and “PositionChanging” subcategory and exclude it because it is a kind of **treatment exercise**.

“PT Goal #4: Patient will report >2 point improvement on the Patient Specific Functional Scale *for standing up from chairs*, getting in/out of vehicle, and putting on shoes/socks.” Same with the example above, highlight this expression and assign it to “BodyPositionChange” class and “PositionChanging” subcategory and exclude it because it is a **goa**l of patient.

“…not to *stand and bend* forward touching her toes”, “*right side bending* approximately 10°”. Similarly, highlight this expression and assign it to “BodyPositionChange” class and “PositionChanging” subcategory and exclude it because it is a kind of **physical exam**.

**WHODAS Questions:**

- - - 1. Standing up from sitting down?

**ABS Scale:**

- - - 1. …bend over?
      2. …stand on a chair?
      3. …get into or out of a car?
      4. …step onto or off of an escalator while you are holding onto a railing?
- **ICF Activity:** Maintaining body position

**ICF Code:** d415

**ICF definition:** Staying in the same body position as required, such as remaining seated or remaining standing for carrying out a task, in play, work or school.

**Inclusion:**

- - - Maintaining a lying position (d4150): Staying in a lying position for some time as required, such as remaining in a prone position in a bed; staying in a prone (face down or prostrate); staying in supine (face upwards); staying in a side-lying position.
    - Maintaining a squatting position (d4151): Staying in a squatting position such as when sitting on the floor without a seat.
    - Maintaining a kneeling position (d4152): Staying in a kneeling position where the body is supported by the knees with legs bent for some time such as during prayers in church.
    - Maintaining a sitting position (d4153): Staying in a seated position, on a seat or the floor, for some time such as when sitting at a desk or table; staying in a sitting position with straight legs or cross-legged, with feet unsupported; staying in a sitting position with straight legs or cross-legged, with feet supported.
    - Maintaining a standing position (d4154): Staying in a standing position for some time such as when standing in a queue; staying in a standing position or hard surfaces; staying in a standing position on a slope; staying in a standing position on slippery surfaces.
    - Maintaining head position (d4155): Controlling the position of the head and supporting its weight for a determined period of time.
    - Maintaining a body position, other specified (d4158)
    - Maintaining a body position, unspecified (d4159)

**Example:**

Inclusion:

*“*Patient tripped on toy and *fell.”*

“*Imbalance* Non Orthopedic.”

“Patient has been *experiencing some balance issues*.”

“…*use of floatation for balance*.”

“*Aggravating Factors: Sitting*”

“…*poor postural control*.”

Regarding examples above, highlight the entire sentences that include the keywords “fell,” “imbalance,” “balance issues,” “use aids for balance,” “Aggravating Factors: Sitting”, “poor postural control” and so on, that means the patient cannot maintain the stand position, so the annotator adds the “BodyPosionChange” label to it and assign category as “PositionMaintaining”, Status as “impaired”, Severity as “N/A”, Experience as “patient”, HistoricalTerm as “current”, and Exclusion as “no.”

““In *standing* today patient is able to focus on arm sweeps.”

“Relieving Factors: *lying down.*”

“Patient *can sit and sleep without hip pain.*”

“Patient was found *lying down* in an ER gurney.”

Highlight the entire sentence and add the label “BodyPosionChange” and assign it to “PositionMaintaining” category. Although the sentence indicates the patient can maintain “standing”, “lying down”, “sitting” position here, it actually shows the patient is impaired, so assign Status attribute as “unimpaired” and Severity attribute as “N/A”.

“*Romberg test negative.*” Although this expression is a Physical Exam, it describes the patient can maintain the erect posture over 60 seconds with eyes closed. Highlight this expression, assign it to “Position Maintaining” subcategory under “BodyPosionChange” label, and assign Status attribute as “unimpaired” and Exclusion as “No”.

“Usually *stays in bed or chair*.” This sentence indicates the patient can maintain the “lying down” or “sitting” positions, so assign it to “Position Maintaining” category under “BodyPosionChange” label, and assign Status attribute as “unimpaired” and Severity attribute as “N/A”.

“*In the left lateral decubitus position*, digital rectal exam was repeated.” This example indicates that the patient can stay in a side-lying position for some time as require, so assign it to “Position Maintaining” category under “BodyPosionChange” label and assign Status attribute as “unimpaired” and Severity attribute as “N/A”.

“*Prone position*.” This example indicates that the patient can staying in a prone (face down or prostrate) during the surgery, so assign it to “PositionMaintaining” category under “BodyPosionChange” label, and assign Status attribute as “umimpaired” and Severity attribute as “N/A”.

Exclusion:

“Systolic Blood Pressure *Sitting* 162 mmHg,”

“Pulse *Standing* 72 bpm,”

“The heart rate *falls* below a certain heart rate,”

“Leave incision open and let Steri-Strips *fall off* on their own.”

Examples above contains keywords “sitting,” “standing,” “fall”, but they don’t mean the patients maintain their body positions, so annotators still need to highlight the entire sentence, and set the Exclusion attribute as “Yes.”

“Do not use a donut-shaped pillow or *sit on* the toilet for long periods.” This example is from the instruction of doctor side, so highlight the entire sentence and set Exclusion as “Yes.”

“You will probably *sleep most comfortably on your back* with your head elevated.” Although this example describes the patient’s sleeping body position, it comes from the patient’s instruction, so exclude it.

“Using ice packs between *sitz* baths may be helpful.” “sitz” in this example is variation of “sit.” It is required to highlight. But it does not mean the body mobility and if from the patient instructions, so exclude it.

“…he states he *fell* asleep in the chair.” Here “fell” does not mean the body position maintaining, so assign it to “Position Maintaining” category under “BodyPosionChange” label, and exclude it.

“Flexion *hold 80-120° in supine.*” This expression describes a treatment exercise, so assign it to “Position Maintaining” category under “BodyPosionChange” label, and exclude it.

“*Sidelying* PROM flexion”. This expression describes a Physical Exam about body range of motion, so assign it to “Position Maintaining” category under “BodyPosionChange” label, and exclude it.

**WHODAS Questions:**

- - 1. Standing or sitting for long periods such as 30 minutes?

2…stand on your tip toes?

- **ICF Activity:** Transferring oneself

**ICF Code:**  d420

**ICF definition:** Moving from one surface to another, such as sliding along a bench or moving from a bed to a chair, without changing body position.

**Inclusion:**

- - - Transferring oneself while sitting (d4200): Moving from a sitting position on one seat to another seat on the same or a different level, such as moving from a chair to a bed; moving from a chair to another seat, such as a toilet seat; moving from a wheelchair to a car seat.
    - Transferring oneself while lying (4201): Moving from one lying position to another on the same or a different level, such as moving from one bed to another.
    - Other specified transferring oneself (4208)
    - Transferring oneself, unspecified (4209)

**Exclusions:**

- - - Changing basic body position (d410): moving from one surface to another with changing body position, such as standing up from wheelchair and then sitting down to the toilet.

**Example:**

Inclusion:

“Patient has difficulty with *transfers*.” Highlight the entire sentence and add the label “BodyPositionChange”, assign the attributes Category as “TransferringOneself”, set Status as “impaired” and Severity attribute as “N/A”.

“For that reason, *she was predominantly bed to chair and had a substantial degree of difficulty being able to transfer* and ambulate on her own initially.” Highlight the entire sentence and add the label “BodyPositionChange”, assign the attributes Category as “TransferringOneself”, set Status as “impaired” and Severity attribute as “N/A”.

“*Transfer Bench x* ”, this example indicates the patient move along a Bench, that means patient transfer need assistant, so highlight the entire expression and add the label “BodyPositionChange”, assign the attributes Category as “TransferringOneself”, set Status as “impaired”.

Exclusion:

“*Transfer* to:” Here, the keyword “transfer” is in a header that means transfer to a different location, such as another healthcare or department, so exclude it.

“Use the tub *transfer bench.*” Here keywords “transfer” is used to describe the bench, so highlight and exclude it.

- **Carrying, moving, and handling object (d430-d449):**
- **ICF Activity:** Lifting and carrying objects

**ICF Code:**  d430

**ICF definition:** Raising up an object or taking something from one place to another, such as when lifting a cup or toy or carrying a box, or a child from one room to another.

**Inclusion:**

- - - Lifting (d4300): Raising up an object in order to move it from a lower to a higher level, such as when lifting a glass from the table.
    - Carrying in the hands (d4301): Taking or transporting an object from one place to another using the hands, such as when carrying a drinking glass or a suitcase.
    - Carrying in the arms (d4302): Taking or transporting an object from one place to another using the arms and hands, such as when carrying a pet or a child or other large object.
    - Carrying on shoulder, hip and back (4303): Taking or transporting an object from one place to another using the shoulders, hip or back, or some combination of these, such as when carrying a large parcel or schoolbag.
    - Carrying on the head (4304): Taking or transporting an object from one place to another using the head, such when as carrying a container of water on the head.
    - Putting down objects (4305): Using hands, arms, or other parts of the body to place an object down on a surface or place, such as when lowering a container of water to the ground.
    - Lifting and carrying, other specified (d4308)
    - Lifting and carrying, unspecified (d4309)

**Example:**

Inclusion:

“*Lifting: I can lift heavy weights* without extra pain.”

“He *avoids lifting really heavy stuff* or climbing.”

“Patient is *able to lift leg independently* and hold 5-10 seconds”

“…*easier straight leg raise*.”

“Patient *has difficulty lifting arm overhead*.”

“…*carrying his portable oxygen tank*.”

Highlight the entire expressions above and add the label “ObjectHandle”, assign the attributes Category as “LiftingAndCarrying”.

Exclusion:

“(instruction:) …*Keep the infected arm or leg raised*.”

“*Lifting is restricted* to less than 30 pounds for six weeks.”

Above examples show the lifting action, but they are from the training instructions, so assign Exclusion attributes as “Yes.”

“…*do not raise left arm* above shoulder level.”

“*Refrain from over-the-head reaching* for the first week post-op.”

Above examples are from the doctor’s suggestion, so exclude it.

“Patient is educated regarding the purpose of *lifting*.” This expression describes patient education, highlight it, and exclude it.

“He will return to weight lifting with no increase in left shoulder pain.” This expression describes patient goal, highlight it, and exclude it.

“*Straight leg raise left leg: at > 70 degrees supine*.” This expression describes physical exam, highlight it, and exclude it.

“*Seated straight leg raise.”* This expression describes treatment exersice, highlight it, and exclude it.

**WHODAS: Question:**

**ABC Scale:**

- - 1. pick up a slipper from the front of a closet floor?

2.…reach for a small can off a shelf at eye level?

- **ICF Activity:** Moving Objects with lower extremities

**ICF Code:**  d435

**ICF definition:** Performing coordinated actions aimed at moving an object by using the legs and feet, such as kicking a ball or pushing pedals on a bicycle.

**Inclusion:**

- - - Pushing with lower extremities (d4350): Using the legs and feet to exert a force on an object to move it away, such as pushing a chair away with a foot.
    - Kicking (d4351): Using the legs and feet to propel something away, such as kicking a ball.
    - Other specified moving objects with lower extremities (d4358)
    - Moving objects with lower extremities, unspecified (d4359)

**Example:**

Inclusion:

“…*playing sports like football*”, highlight the expression and assign Category “MovingObjectWithLowExtremities” under label “ObjectHandle”, and set Status as “unimpaired” and Severity attribute as “N/A”.

Exclusion:

“*No weight on or moving affected foot* until instructed by doctor.”

“*left calf pushing.*”

Above examples are from patient instructions, so exclude it.

- **ICF Activity:** Fine hand use.

**ICF Code:** d440

**ICF definition:** Performing the coordinated actions of handling objects, picking up, manipulating, and releasing them using one's hand, fingers and thumb, such as required to lift coins off a table or turn a dial or knob.

**Inclusion:**

- - - Picking up (d4400): Lifting or taking up a small object with hands and fingers, such as when picking up a pencil.
    - Grasping (d4401): Using one or both hands to seize and hold something, such as when grasping a tool or a doorknob.
    - Manipulating (d4402): Using fingers and hands to exert control over, direct or guide something, such as when handling coins or other small objects, such as scissors, shoelaces, pencils, chop sticks, knives, and forks.
    - Releasing (d4403): Using fingers and hands to let go or set free something so that it falls or changes position, such as when dropping an item of clothing or a piece of food for a pet.
    - Other specified fine hand use (d4408)
    - Fine hand use, unspecified (d4409)

**Exclusions:**

- - Lifting and carrying objects (d430): Raising up an object or taking something from one place to another with hand, such as when lifting a cup or toy or carrying a box.

**Example:**

Inclusion:

“*Hold the cap out* of the way.”

“Strength is lessening, *opening jars*.”

Above examples indicate the fine hands use, so assign the category as “FineHandUse” under class “ObjectHandle,” and set Status as “unimpaired” .

Exclusion:

“*Grab bars* in shower.” Highlight the expression and assign to “FineHandUse” under class “ObjectHandle,” then exclude due to the instruction.

“*The hand grip* for the left break was also loose.”

“Does not have *grab bars* by the toilet.”

Highlight the expressions above and assign to “FineHandUse” under class “ObjectHandle,” then exclude due to the equipment.

- **ICF Activity:** Hand and arm use.

**ICF Code:** d445

**ICF definition:** Performing the coordinated actions required to move objects or to manipulate them by using hands and arms, such as when turning door handles or throwing or catching an object.

**Inclusion:**

- - - Pulling (d4450): Using fingers, hands, and arms to bring an object towards oneself, or to move it from place to place, such as when pulling on a string or pulling a door closed.
    - Pushing (d4451): Using fingers, hands, and arms to move something from oneself, or to move it from place to place, such as when pushing a toy or an animal away.
    - Reaching (d4452): Using the hands and arms to extend outwards and touch and grasp something, such as when reaching across a table or desk for a book.
    - Turning or twisting the hands or arms (d4453): Using fingers, hands, or arms to rotate, turn or bend an object, as is required to open a jar or use tools such as toothbrush or screwdriver.
    - Throwing (d4454): Using fingers, hands, and arms to lift something and propel it with some force through the air, such as when tossing a ball.
    - Catching (d4455): Using fingers, hands, and arms to grasp a moving object in order to bring it to a stop and hold it, such as when catching a ball.
    - Other specified hand and arm use (d4458)
    - Hand and arm use, unspecified (d4459)

**Exclusions:**

- - - Fine hand use (d440): Performing the coordinated fine actions of handling objects, picking up, manipulating, and releasing them using one's hand, fingers and thumb, without the strength of the arm, such as required to lift coins off a table or turn a dial or knob.

**Example:**

Inclusion:

“Was *bring* groceries in the house.”

“*Pick Up Object from Floor* from a Standing Position: Able to pick up slipper safely and easily.”

“He is able to *move both upper extremities* without any gross restriction.”

“He has *increased overhead reach*.”

Above examples indicate the patient can use his arm and hand to carry, move and reach object, set expressions as “HandAndArmUse” category under “ObjectHandle” class and assign Status as “unimpaired” and Severity attribute as “N/A”.

Exclusion:

“He is able to *move both upper extremities* without any gross restriction.” According to ICF definition, “Performing the coordinated actions required to move by using hands and arms,” here not mention ant object except arms, so set expressions as “HandAndArmUse” category under “ObjectHandle” class, and exclude it.

“You *may NOT lift, pull, or push with this arm*.”

“*Use of the arm may interfere with the stability and healing of the shoulder repair*.”

“*Without moving your shoulder, stretch your elbow, wrist, and fingers daily*.”

Examples above that describe the mobility of hands and arms are from patient discharge instructions, so exclude it.

“…*throwing* up?” This phrase contains the keyword “*throw*”, but means vomit, so highlight the phrase and exclude it.

“…*push through* weak spots in the colon.” This example contains the keyword “*push*”, but not using hand and arm, so excludes it.

“If this continues, *your fingers, hands, and toes may begin to spasm*.” This example is from patient instructions though it indicates the problem occur on the hand and food, so exclude it.

“Under operating microscope cerumen was removed from both ear canals with a *pick*, suction, and alligator.” Here, the keyword “pick” is used as a tool, so exclude it.

“Patient will *obtain a coat hanger from the closet with the affected extremity*.” This sentence describes a patient goal, exclude it.

**WHODAS Question:**

**ABC Scale:**

1....and reach for something above your head?

- **ICF Activity:** Fine foot use

**ICF Code**: d446

**ICF definition:** Performing the coordinated actions to move or manipulate objects using one's foot and toes.

**Example:**

Inclusion:

“He still *struggles with the toe towel scrunches*”, highlight the entire sentence and assign it in “FineFootUse” subcategory, and set Status as “impaired” and Severity attribute as “N/A”.

- - **ICF Activity:** Carrying, moving, and handling objects, other specified and unspecified.

**ICF Code:** d449

**Note:**

- **Walking and moving (d450-d469):**
- **ICF Activity:** Walking

**ICF Code**: d450

**ICF definition:** Moving along a surface on foot, step by step, so that one foot is always on the ground, such as when strolling, sauntering, walking forwards, backwards, or sideways.

**Inclusion:**

- - - Walking short distances (d4500): Walking for less than a kilometer, such as walking around rooms or hallways, within a building or for short distances outside.
    - Walking long distances (d4501): Walking for more than a kilometer, such as across a village or town, between villages or across open areas.
    - Walking on different surfaces (d4502): Walking on sloping, uneven, or moving surfaces, such as on grass, gravel or ice and snow, or walking aboard a ship, train, or other vehicle.
    - Walking around obstacles (d4503): Walking in ways required to avoid moving and immobile objects, people, animals, and vehicles, such as walking around a marketplace or shop, around or through traffic or other crowded areas.
    - Other specified walking (d4508)
    - Walking, unspecified (d4509)

**Exclusions:**

- Moving around (d455): Moving the whole body from one place to another by means other than walking, such as climbing over a rock or running down a street, and so on.
- Transferring oneself (d420): Moving from one surface to another, such as sliding along a bench or moving from a bed to a chair, without changing body position.

**Example:**

Inclusion:

“She *is able to ambulate*,”

“…*walking* on outdoor surfaces.”

Above examples that contain keywords “ambulate”, “walking” indicate the patients can walk, so set category as “walking” under class “WalkingAndMoving” and set Status as “unimpaired” and Severity attribute as “N/A”.

“No *limp*”, “Nonantalgic *gait*”. Highlight these expressions that describes walking, and assign them in the subcategory “Walking” of class “WalkingAndMoving”.

Exclusion:

“*Walking* is the best form of exercise after surgery.”

“*Keep your walking pace* under 3-3.5 mph.”

Above examples that contain the keywords “walk” are from doctor’s suggestions, so exclude them.

“He will report at least 50% decreased pain *walking.*” This sentence contains the keywords “walking”, but it is a goal of patient, so exclude it.

“Hip abductor and oblique training for lateral trunk lean during *gait.*” This sentence contains the keywords “gait”, but it is a treatment plan of patient, so exclude it.

“*Walking* knee to chest and quad pulls,” highlight this expression and exclude it due to a treatment exercise.

“Walk-in shower”, this expression describes shower, so highlight exclude it.

**WHODAS Question:**

- - 1. Walking a long distance such as a kilometer [or equivalent]?

**ABC Scale:**

- **ICF Activity:** Going up and down stairs

**ICF Code:** d451

**ICF definition:** Moving upwards and downwards so that at least one foot is always on the ground such as ascending and descending stairs or curbs.

**Exclusion:**

- - - Climbing (d4551): Moving the whole body upwards or downwards, focus on over surfaces or objects, such as climbing rocks, ladders or other objects.
    - Walking (d450): Focus on moving along a same level surface on foot, step by step, so that one foot is always on the ground, such as when strolling, sauntering, walking forwards, backwards, or sideways.

**Example:**

Inclusion:

“…*walk down*.”

“(patient says:)…I *cannot* *walk up stairs*.”

“…*Stair-climbing*

*ascending stairs: independent*”

*“…ascending and descending stairs”*

Highlight entire sentences above, set them to “GoingUpAndDwonStairs” category of Class “WalkingAndMoving”.

Exclusion:

“(instruction:) …You *cannot walk up stairs*.” This example is from instruction of doctor, so exclude it.

“This may help the swelling *go down.*” This example does not indicate the body mobility, so exclude it.

“*Step down* 6": 10 reps bilaterally”, “Knee flex/ext stretch *On stairs*”, they are treatment exercises, exclude them.

**ABC Scale:**

- - 1. …walk up or down stairs?
  - **ICF Activity:** Moving around

**ICF Code**: d455

**ICF definition:** Moving the whole body from one place to another by means other than walking, such as climbing over a rock or running down a street, skipping, scampering, jumping, somersaulting, or running around obstacles.

**Inclusion:**

- - - Crawling (d4550): Moving the whole body in a prone position from one place to another on hands, or hands and arms, and knees.
    - Climbing (d4551): Moving the whole body upwards or downwards, over surfaces or objects, such as climbing steps, rocks, ladders or stairs, curbs, or other objects. Exclude Going up and down stairs(d451).
    - Running (d4552): Moving with quick steps so that both feet may be simultaneously off the ground.
    - Jumping (d4553): Moving up off the ground by bending and extending the legs, such as jumping on one foot, hopping, skipping, and jumping or diving into water.
    - Swimming (d4554): Propelling the whole body through water by means of limb and body movements without taking support from the ground underneath.
    - Other specified moving around (d4558)
    - Moving around, unspecified (d4559)

**Exclusion:**

- - - Transferring oneself (d420): Moving from one surface to another, such as sliding along a bench or moving from a bed to a chair, without changing body position.
    - Walking (d450): Focus on moving along a surface on foot, step by step, so that one foot is always on the ground, such as when strolling, sauntering, walking forwards, backwards, or sideways.

**Example:**

Inclusion:

“…is *moving around* adequately.” This example contains the keyword “move around” and highlight entire sentence, set it to “MovingAround” category of Class “WalkingAndMoving,” and set Status attribute as “unimpaired” and Severity attribute as “N/A”.

“He does not *swim* so pool exercise is ruled out.”

“He avoids lifting really heavy stuff or *climbing*.”

“Patient states this occurred when she was getting up during the early morning hours on Monday and she did not rely on to bother her husband and she *ran into the wall*.”

Above examples contain keywords “swim, climb, run,” that means the whole body move from one place to another, highlight them and assign them to subcategory “MoveAround” in class “WalkingAndMoving.”

Exclusion:

“Refill your medicines before they *run* out.”

“Positive *jump* sign with point tenderness demonstrated.”

Although these examples contain the keyword “run,” “jump,” they did not the patient’s mobility, so exclude it.

“Reviewed home exercise program and added *climbing* the wall when she is visiting her husband.” This example is a goal of patient, so exclude it.

**WHODAS Question:**

**ABC Scale:**
 1. …walk up or down a ramp?

- **ICF Activity:** Moving around in different locations

**ICF Code**: 460

**ICF definition:** Walking and moving around in various places and situations, such as walking between rooms in a house, within a building, or down the street of a town.

**Inclusion:**

- - - Moving around within the home (d4600): Walking and moving around in one's home, within a room, between rooms, and around the whole residence or living area; moving from floor to floor; moving on an attached balcony; moving in a restricted area such as a courtyard, porch or garden.
    - Moving around within the buildings other than home (d4601): Walking and moving around within buildings other than one's residence, such as moving around other people's homes, other private buildings, community and public buildings and enclosed areas; moving throughout all parts of buildings and enclosed areas; moving between floors; moving inside, outside and around buildings, both public and private.
    - Moving around outside the home and other buildings (d4602): Walking and moving around close to or far from one's home and other buildings, without the use of transportation, public or private, such as walking for short or long distances around a town or village; walking or moving down streets in the neighborhood, town, village, or city; moving between cities, without using transportation.
    - Other specified moving around in different locations (d4608)
    - Moving around in different locations, unspecified (d4609)

**Example:**

Inclusion:

“Patient *was walking at Oxbow Park this morning with no difficulty.*”

“Able to *hike*.”

Above examples indicated the patients “walking” outside like a park, “Oxbow Park” or outside for “hike”, so assign them in subcategory as “walkingAroundInDifferentLocation” under class “WalkingAndMoving” and set Status as “unimpaired” due to “with no difficulty” and “Able to”.

“…*taking patient out of the house*.” This example indicates the patient need someone’s help to walk around in different place, so set category as “walkingAroundInDifferentLocation” under class “WalkingAndMoving” and set Status as “impaired” and Severity as “N/A”.

Exclusion:

“Patient will benefit from a few additional visits for focused unilateral proprioceptive and strength challenges in preparation for upcoming *hiking trip* and eventual return to full recreational activity.” Exclude it because of benefit.

“She is looking forward to her trip at the end of September which will involve a lot of *hiking*.” Exclude it because of plan.

**WHODAS:**

- - 1. Getting out of your home?

2.Moving around inside your home?

**ABC Scale:**

1. ...walk around the house?

2. …walk outside the house to a car parked in the driveway?

3. …walk across a parking lot to the mall?

4. …walk in a crowded mall where people rapidly walk past you?

- **ICF Activity:** Moving around using equipment

**ICF Code**: d465

**ICF definition:** Moving the whole body from place to place, on any surface or space, by using specific devices designed to facilitate moving or create other ways of moving around, such as with skates, skis, or scuba equipment, or moving down the street in a self-propelled wheelchair or a walker.

**Exclusion:**

- - - Driving (d475): People control and move a vehicle or the animal powered vehicle by themselves.
    - Moving around (d455): Moving the whole body from one place to another by means other than walking without other assistive equipment.
    - Transferring oneself (d420): Moving from one surface to another without using other specific assistive devices, such as sliding along a bench or moving from a bed to a chair.
    - Using transportation (d470): Using transportation to move around as a passenger, such as being driven in a car, bus, rickshaw, jitney, pram or stroller, wheelchair, animal-powered vehicle, private or public taxi, train, tram, subway, boat or aircraft and using humans for transportation.
    - Walking (d450): Moving along a surface on foot, step by step, so that one foot is always on the ground without using specific assistive equipment, such as when strolling, sauntering, walking forwards, backwards, or sideways.

**Example:**

Inclusion:

“(Patient says:)…she always *uses her walker for transfers and moving* about…” This example indicates the patient can walk using equipment “walker”, so highlight the entire sentence and set it to category “MovingAroundUsingEquipment” and set Status attribute as “impaired” and Severity attribute as “N/A”.

“Arrival mode: Wheelchair.” Highlight the entire expression and set it to “MovingAroundUsingEquipment” category and assign Status attribute as “impaired” and Severity attribute as “N/A”.

“Has not used a *cane* or *walker*.”

“Ambulation/Balance: today he ambulated with his *4 wheeled walker*.”

“Patient can walk on *a treadmill*.”

Highlight examples above, and assign them into subcategory “MovingAroundUsingEquipment” of class “WalkingAndMoving”.

Exclusion:

“*Do not attempt to use crutches for walking*.” This example is from the patient instruction, so exclude it.

“Discussed use of *trekking poles.*” This example is from discussion, so exclude it.

- **ICF Activity:** Walking and moving, other specified and unspecified

**ICF Code**: 469

**ABC Scale:**

- - 1. …sweep the floor?
    2. …are bumped into by people as you walk through the mall?
    3. …walk outside on icy sidewalks?
- **Moving around using transportation (d470-d489):**
- **ICF Activity:** Using transportation

**ICF Code**: d470

**ICF definition:** Using transportation to move around as a passenger, such as being driven in a car, bus, rickshaw, jitney, pram or stroller, wheelchair, animal-powered vehicle, private or public taxi, train, tram, subway, boat, or aircraft and using humans for transportation.

**Inclusion:**

- - - Using human-powered vehicles (d4700): Being transported as a passenger by a mode of transportation powered by one or more people, such as riding in a pram or stroller, wheelchair propelled by another, rickshaw, or rowboat.
    - Using private motorized transportation (d4701): Being transported as a passenger by private motorized vehicle over land, sea, or air, such as by car, taxi or privately owned aircraft or boat.
    - Using public motorized transportation (d4702): Being transported as a passenger by a motorized vehicle over land, sea or air designed for public transportation, such as being a passenger on a bus, train, subway, or aircraft.
    - Using humans for transportation (d4703): Being transported by another person, such as being carried in the arms, in a sheet, in a backpack or a transportation device.
    - Other specified using transportation (d4708)
    - Using transportation, unspecified (d4709)

**Exclusion:**

- - - Driving(d475): Focus on controlling and moving a vehicle or the animal powered vehicle by the people self.
    - Moving around using equipment(d465): Moving the whole body from place to place by using specific device, such as with skates, skis, or scuba equipment, or moving down the street in a self-propelled wheelchair or a walker.

**Example:**

Inclusion:

“Arrival mode: Private vehicle.” Highlight the entire expression and set it to “UsingTransportation” category of class “TranspotationUse”. Since unsure the patient drive the private vehicle or just take the vehicle as a passenger, so set the Status attribute as “possible” and Severity attribute as “N/A”.

“Arrival mode: Ambulance.” Highlight the entire expression and set it to “UsingTransportation” category of class “TranspotationUse”, assign Status attribute as “impaired” and Severity attribute as “N/A”.

“Arrival mode: Stretcher.” Highlight the entire expression and set it to “UsingTransportation” category of class “TranspotationUse”, assign Status attribute as “impaired” and Severity attribute as “N/A”.

“…*son provided transportation*.” Highlight the entire expression and set it to “UsingTransportation” category of class “TranspotationUse”, assign Status attribute as “impaired” and Severity attribute as “N/A”.

“Patient *will transport* when ready.” Highlight the entire expression and set it to “UsingTransportation” category of class “TranspotationUse”, assign Status attribute as “impaired” and Severity attribute as “N/A,”and assign HistoricalTerm attribute as “future.”

- - **ICF Activity:** Driving

**ICF Code**: d475

**ICF definition:** Being in control of and moving a vehicle or the animal that draws it, travelling under one's own direction or having at one's disposal any form of transportation appropriate for age, such as a car, bicycle, boat, or animal powered vehicle.

**Inclusion:**

- - - Driving human-powered transportation(d4750): Driving a human-powered vehicle, such as a bicycle, tricycle, or rowboat.
    - Driving motorized vehicles(d4751): Driving a vehicle with a motor, such as an automobile, motorcycle, motorboat, or aircraft.
    - Driving animal-powered vehicles(d4752): Driving a vehicle powered by an animal, such as a horse-drawn cart or carriage.
    - Other specified driving(d4758)
    - Driving, unspecified(d4759)

**Exclusion:**

- - - Moving around using equipment(d465): Moving the whole body from place to place by using specific device, such as with skates, skis, or scuba equipment, or moving down the street in a self-propelled wheelchair or a walker.
- Using Transportation(d470): Using transportation to move around as a passenger.

**Example:**

Inclusion:

“Patient *operates a motor vehicle.*” Highlight the entire sentence and set it to “Driving” category of class “TranspotationUse”, assign Status attribute as “unimpaired” and Severity attribute as “N/A”.

“He *cannot drive his car*…” Highlight the entire sentence and set it to “Driving” category of class “TranspotationUse”, assign Status attribute as “impaired” and Severity attribute as “N/A”.

“Owns a *NuStep*. Hasn't been on it for a long time.”

“Able to tolerate *noodle biking*.”

“*The bike is also limited* by her left knee flexion.”

Exclusion:

“Wear a helmet *while bike riding*.”

“No driving until healed and in a suitable shoe.”

“The surgical shoe should not be used to *drive in.*”

“*Elton Hills Drive* NW, Rochester”

Above examples are from the patient instructions, so exclude them.

“She may get more leverage on the *NuStep* if using equipment.”

“Active warmup on *recumbent bike*.”

“*Stationary bike*.”

“…*elliptical warm-up.*”

Highlight above examples and exclude them due to the treatment exercises.

**WHODAS Question:**

- - 1. Learning a new task, for example, learning how to get to a new place?
  - **ICF Activity:** Riding animals for transportation

**ICF Code**: d480

**ICF definition:** Travelling on the back of an animal, such as a horse, ox, camel, or elephant.

**Example:**

Inclusion:

“*horseback riding*”, Highlight the expression and set it to “RidingAnimals” category of class “TranspotationUse”.

“…*fell from horse.*” Highlight the entire sentence and set it to “RidingAnimals” category of class “TranspotationUse”, assign Status attribute as “impaired” and Severity attribute as “N/A”.

Exclusion:

“*Avoid horseback riding*.” Highlight the entire sentence and set it to “RidingAnimals” category of class “TranspotationUse”, assign Status attribute as “unimpaired” and Severity attribute as “N/A”, Exclusion attribute as “yes” due to instruction.

- - **ICF Activity:** Moving around using transportation, other specified and unspecified **ICF Code**: d489
- Other Mobility:
  - **Mobility, Other specified:** This category is an 'other specified' residual category

**ICF Code:** d498

- - - Highlight patient’s diagnosis, system review, temporary symptoms, and procedural, surgery treatment which influence patient mobility function status or predict to cause the mobility limitations.
    - Assign the expression to category “Specified” under class “OtherMobility” and assign appropriate attributes.
  - **Example:**
- **Mobility, unspecified:** This category is an 'other specified' residual category

**ICF Code:** d499

- - Focus on patients’ generic mobility.
  - Keywords: mobility, movement, motor, activity, exercise, work out, sports, athletic, and so on.
    - Assign the expression to category “Unspecified” under class “OtherMobility” and assign appropriate attributes.
  - **Example**:

Inclusion:

“…*normal motor observed*,”

“…lower back pain with *movement*,”

“There are *exacerbating factors including movement, transfer* and weight bearing.”

“Patient *moves all 4 extremities*.”

“He has *not been able to do some of his exercises*.”

“Did well with deep water *activities*.”

“Patient states she has been *working on home exercise program and feels some improvements.*”

“*Decline in independence with functional mobilities*.”

“Patient returned fully to *yoga*.”

“Owns a *NuStep*. Hasn't been on it for a long time.”

“Able to tolerate *noodle biking*.”

Exclusion:

“*Extraocular movements* are intact.”

“…*bowel movement*…”

“*Patient Activity Level:*”

“It is important to follow *activity guidelines*.”

“PLAN: Precautions *on activity*.”

“*Motor* stimulation”

“*Sports Medicine*”

“*Athletic Performance*”

“*Therapeutic Exercise (min):* 32 min”

“Patient will be independent with a *home exercise program*.”

“*Normal ROM*” (ROM: Range of motion)

“…*normal motor observed*,”

- 1. Annotation attributes

Annotators need highlight an entire sentence or a phrase that contains the keywords and label it with appropriate class tag. Annotators must select and fill a drop-down item of each category tag according to the highlighted expression. Also, they need assign relevant attribute to them, such as Status (impaired/possible/unimpaired), Negation(yes/no), Experiencer (patient/other), Severity (severe/moderate/mild/uncertain/N/A), Historical term (current/past/future), Exclusion (yes/no), and Comment. If setting the expression’s attribute “Exclusion” is “Yes”, fill the explanation in the blank of “Comment”.

**Note:**

- Annotators should focus only on direct mentions of mobility. Avoid indirect references or general statements that imply mobility. Only consider segments that explicitly describe mobility activities or challenges.
- Do not annotate the **Self-care** related expression come under mobility, such as activities of daily living (ADL).
- Do not annotate the **Physical Exam** about the body and four extremity motion because these belong to Neuromusculoskeletal and movement-related functions in Body functions category, such as related range of motion (ROM) assessment.
- Annotate but consider as exclusion forthe **Treatment/Exercises** related Physical therapy because these are not actual patient mobility.
- Annotate but consider as exclusion forthe sentences containing body mobility that is described in **Instructions**, **Educations**, **Reminders**, **Discussion**, **Benefits**, **Goals**, recommendation, advice, and so on for the same reason above, such as physical therapy routines, home exercise instructions, exercise education, general exercise activity levels, or exercise routines.
- Do not annotate the related expression present in the specific section, such as **Document Header,** **Treatment, Treatment plan, Plan, Goals, Education**, and so on.
- Regarding the patient’s living environment, assist device, including descriptions of stairs, rails, ramps, steps to enter the home, gait assistant device such as wheelchair, or other home modifications, do not count towards mobility functional status if there is no clear indication that patients is using this kind of device.
- Some conditional statement, question statement, they are usually express a conditional hypothesis or inquiry, do not consider them as mobility function status.
- If there are multiple expression in one sentence or section, as long as one of the expressions indicated impaired, this category of mobility function status is judged as impaired. The impairment judgement priority is impaired > possible > unimpaired. Such as, “Aggravating Factors: walking, standing, and squats; Relieving Factors: sitting, lying down.” Here, concepts “standing, squats, sitting, lying down,” belong to the category “Changing and maintaining body position”, and although the expressions “standing, squats” are impaired, but the expressions “sitting, lying down” are unimpaired, the category “Changing and maintaining body position” is judged as impaired.

**B Supplementary Tables**

**Table S1.** Five Mobility Functional Status Classes and Corresponding ICF Codes and Subclasses.

| Class | ICF Code | ICF Subclass |
| --- | --- | --- |
| Changing and maintaining body position | d410 | Changing basic body position |
| d415 | Maintaining body position |
| d420 | Transferring oneself |
| d429 | Changing and maintaining body position, other specified and unspecified |
| Carrying, moving and handling objects | d430 | Lifting and carrying objects |
| d435 | Moving objects with lower extremities |
| d440 | Fine hand use |
| d445 | Hand and arm use |
| d446 | Fine foot use |
| d449 | Carrying, moving and handling objects, other specified and unspecified |
| Walking and moving | d450 | Walking |
| d451 | Going up and down stairs |
| d455 | Moving around |
| d460 | Moving around in different locations |
| d465 | Moving around using equipment |
| d469 | Walking and moving, other specified and unspecified |
| Moving around using transportation | d470 | Using transportation |
| d475 | Driving |
| d480 | Riding animals for transportation |
| d489 | Moving around using transportation, other specified and unspecified |
| Mobility, unspecified | d499 | Mobility, unspecified |

| **Table S2.** Performance of Task 1 (Mobility Extraction) and Task 2 (Impairment Classification) Across Mobility Classes and Institutions with Error-Informed Prompt Refinement at Section Level.   | Class | Site 1 | | | | Site 2 | | | | Site 3 | | | | | --- | --- | --- | --- | --- | --- | --- | --- | --- | --- | --- | --- | --- | | Task 1 | | | Task2 | Task 1 | | | Task 2 | Task 1 | | | Task 2 | | P | R | F1 | F1 | P | R | F1 | F1 | P | R | F1 | F1 | | Changing and maintaining body position | 0.840 | 0.792 | 0.815 | 0.851 | 0.707 | 0.779 | 0.741 | 0.821 | 0.707 | 0.676 | 0.691 | 0.793 | | Carrying, moving, and handling objects | 0.831 | 0.720 | 0.771 | 0.857 | 0.813 | 0.559 | 0.662 | 0.780 | 0.500 | 0.455 | 0.476 | 0.769 | | Walking and moving | 0.760 | 0.975 | 0.854 | 0.949 | 0.778 | 0.976 | 0.866 | 0.913 | 0.388 | 1.000 | 0.559 | 0.957 | | Moving around using transportation | 0.774 | 0.667 | 0.716 | 0.750 | 0.878 | 0.750 | 0.809 | 0.684 | 0.979 | 0.724 | 0.832 | 0.590 | | Mobility, unspecified | 0.385 | 0.468 | 0.422 | 0.586 | 0.478 | 0.516 | 0.496 | 0.649 | 0.268 | 0.348 | 0.303 | 0.717 | | Average | 0.696 | 0.766 | 0.729 | 0.832 | 0.691 | 0.758 | 0.723 | 0.814 | 0.543 | 0.690 | 0.608 | 0.785 |   *P: Precision, R: Recall, F1: F1-score. |
| --- | --- | --- | --- | --- | --- | --- | --- | --- | --- | --- | --- | --- | --- | --- | --- | --- | --- | --- | --- | --- | --- | --- | --- | --- | --- | --- | --- | --- | --- | --- | --- | --- | --- | --- | --- | --- | --- | --- | --- | --- | --- | --- | --- | --- | --- | --- | --- | --- | --- | --- | --- | --- | --- | --- | --- | --- | --- | --- | --- | --- | --- | --- | --- | --- | --- | --- | --- | --- | --- | --- | --- | --- | --- | --- | --- | --- | --- | --- | --- | --- | --- | --- | --- | --- | --- | --- | --- | --- | --- | --- | --- | --- | --- | --- | --- | --- | --- | --- | --- | --- | --- | --- | --- | --- | --- | --- | --- | --- | --- | --- | --- | --- | --- | --- | --- |

**Table S3.** F1-score of Two Tasks Across Mobility Classes Aggregated Across All Institutions with Error-Informed Prompt Refinement.

| Class | Section-Level | | Note-Level | | Patient-Level | |
| --- | --- | --- | --- | --- | --- | --- |
| Task 1 | Task2 | Task 1 | Task2 | Task 1 | Task 2 |
| Changing and maintaining body position | 0.757 | 0.826 | 0.854 | 0.897 | 0.901 | 0.935 |
| Carrying, moving, and handling objects | 0.701 | 0.817 | 0.758 | 0.829 | 0.771 | 0.831 |
| Walking and moving | 0.788 | 0.934 | 0.869 | 0.931 | 0.900 | 0.938 |
| Moving around using transportation | 0.812 | 0.636 | 0.879 | 0.670 | 0.898 | 0.777 |
| Mobility, unspecified | 0.428 | 0.633 | 0.711 | 0.762 | 0.852 | 0.896 |
| Average | 0.695 | 0.815 | 0.819 | 0.849 | 0.876 | 0.897 |

*F1: F1-score.

**References**

1. World Health Organization. International Classification of Functioning, Disability, and Health: Children & Youth Version: ICF-CY. World Health Organization; 2007.

2. World Health Organization. Measuring health and disability: manual for WHO disability assessment schedule (WHODAS 2.0). World Health Organization; 2010.

3. Powell LE, Myers AM. The activities-specific balance confidence (ABC) scale. The journals of Gerontology Series A: Biological sciences and Medical sciences. 1995 Jan 1;50(1):M28-34.
